# Supplementary material for: Chrysanthemum-like Fe–Co LDH with peroxidase mimicking activity for visual and photothermal determination of H 2 O 2 and glucose
Source: Royal Society of Chemistry journal article supplement (doi:10.1039/d5ay01416f), 2025-01-01
Supplement: d5ay01416f1.pdf [file d5ay01416f1.pdf]

# **Chrysanthemum-like Fe-Co LDH with peroxidase mimicking activity for visual and photothermal determination of H<sub>2</sub>O<sub>2</sub> and glucose**

Youxiu Lin<sup>a, \*</sup>, Yangyang Chen<sup>a</sup>, Jiangwei Huang<sup>a</sup>, Dianping Tang<sup>b</sup>, Wenqiang Lai<sup>a,\*</sup>

<sup>a</sup> Key Laboratory of Modern Analytical Science and Separation Technology of Fujian Province, Key Laboratory of Pollution Monitoring and Control of Fujian Province, College of Chemistry, Chemical Engineering and Environment, Minnan Normal University, Zhangzhou 363000, People's Republic of China

<sup>b</sup> Key Laboratory of Analysis and Detection for Food Safety (MOE & Fujian Province), Institute of Nanomedicine and Nanobiosensing, Department of Chemistry, Fuzhou University, Fuzhou 350108, People's Republic of China

*\*Corresponding author: Youxiu Lin, E-mail: [youxiu90@163.com](mailto:youxiu90@163.com)*

## **Materials and reagents**

Ferric(III) chloride hexahydrate (FeCl<sub>3</sub>·6H<sub>2</sub>O), Cobalt(II) nitrate hexahydrate (Co(NO<sub>3</sub>)<sub>3</sub>·6H<sub>2</sub>O), urea (CO(NH<sub>2</sub>)<sub>2</sub>), ammonium fluoride (NH<sub>4</sub>F), 3,3',5,5'-tetramethylbenzidine (TMB), sodium hydroxide (NaOH), ethanol (C<sub>2</sub>H<sub>5</sub>OH), hydrogen peroxide (30 wt%) (H<sub>2</sub>O<sub>2</sub>), acetic acid (CH<sub>3</sub>COOH), sodium acetate (CH<sub>3</sub>COONa), horseradish peroxidase (HRP), glucose oxidase (GOx), fructose, sucrose, lactose, ascorbic acid (AA), glutathione (GSH) sucrose were purchased from Aladdin Bio-Chem Technology Co. Ltd (Shanghai, China). Ultrapure water was used in all the experiments. All chemicals were of analytical standard, used as received.

## **Instruments and equipment**

All the temperature was detected by a digital multimeter (Shengli Technology, China). The surface morphology of the sample was obtained from scanning electron microscopy (SEM, Tescan Mira4, USA). UV-vis spectra were obtained on a Infinite

200 PRO microplate reader (Tecan, Switzerland). X-ray diffraction (XRD) patterns were obtained by using D8 focus diffractometer (Bruker AXS, Germany). X-ray photoelectron spectra (XPS) were elucidated using an ESCALAB 250 electron energy spectrometer (Thermo Fisher Scientific K-Alpha, USA). Infrared spectra spectrometer (FTIR) was scanned using a Nicolet iS50 FTIR spectrometer (Thermo Fisher Scientific, USA); X-ray photoelectron spectroscopy (XPS) was performed using an Escalab 250Xi instrument (Thermo Fisher Scientific, USA), the ultraviolet spectrophotomete (UV-vis) performed using Infinite 200 PRO microplate reader (Tecan, Switzerland)

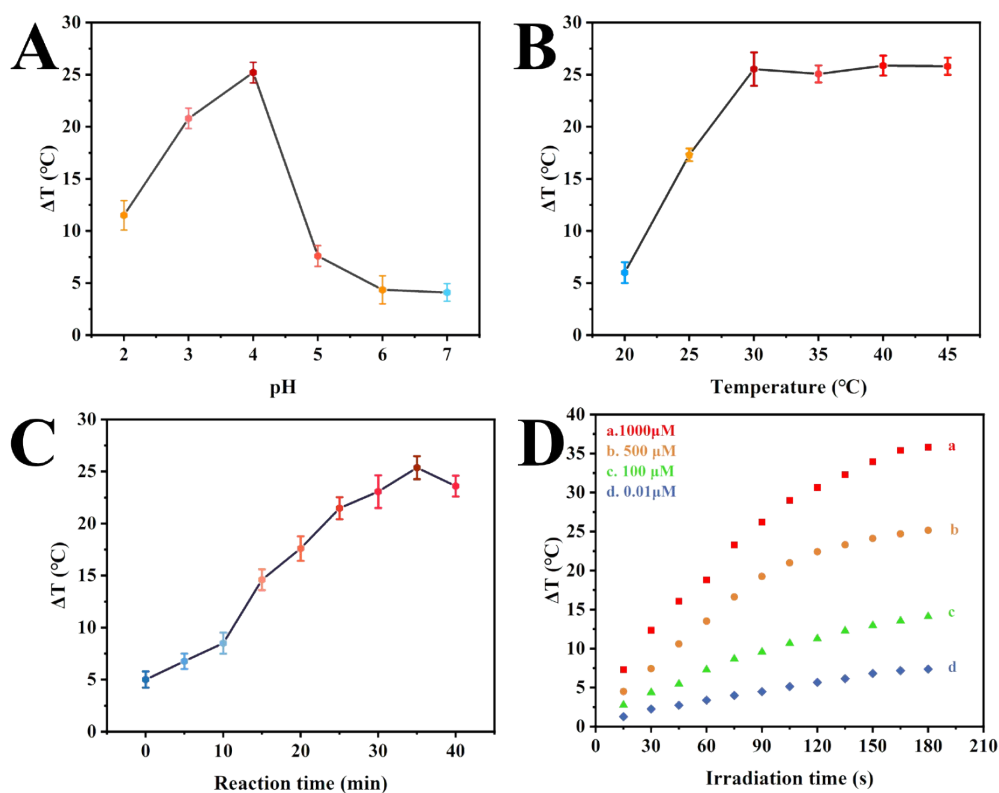

Fig. S1 Optimization of conditions for  $\text{H}_2\text{O}_2$  detection. Effects of (A) buffer pH (A), (B) temperature, (C) reaction time, and (D) irradiation time on the detection of  $\text{H}_2\text{O}_2$ .

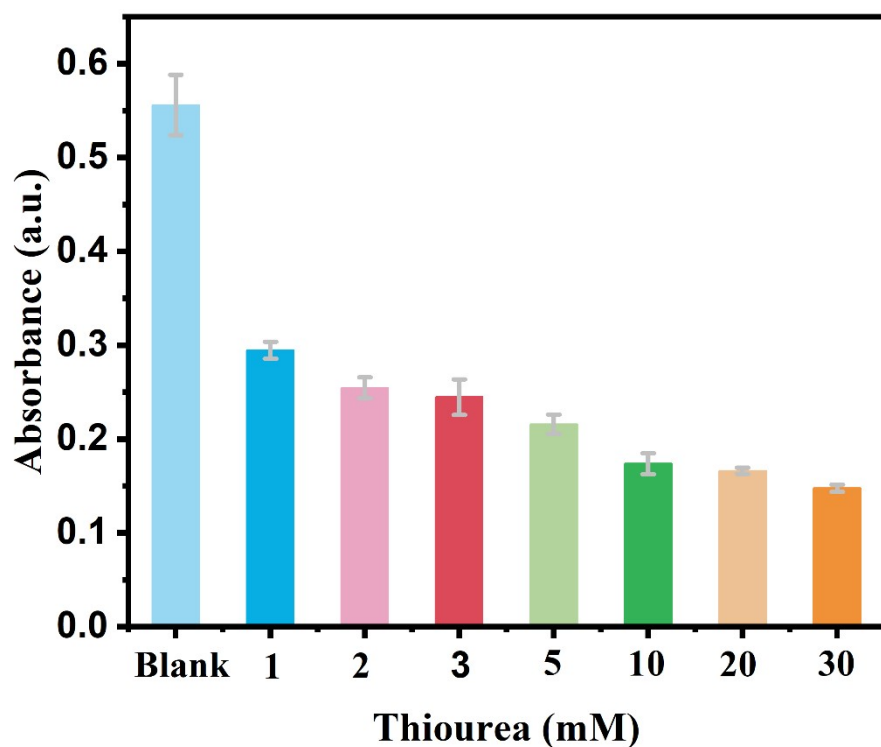

Fig. S2 Absorbance at 652 nm of TMB-H<sub>2</sub>O<sub>2</sub> solution catalyzed by Fe-Co LDH in presence of different concentrations scavengers thiourea.

Table S1 Comparison of determination methods for H<sub>2</sub>O<sub>2</sub>.

| Materials                        | Methods      | Linear rang<br>( $\mu$ M) | LOD( $\mu$ M) | Reference |
|----------------------------------|--------------|---------------------------|---------------|-----------|
| MOF-808                          | colorimetry  | 10-1000                   | 4.5           | [1]       |
| Co <sub>3</sub> O <sub>4</sub>   | colorimetric | 100-5000                  | 4.08          | [2]       |
| CuFe <sub>2</sub> O <sub>4</sub> | colorimetric | 200-500                   | 50.9          | [3]       |
| Fe-N-C SANs                      | colorimetric | 10-600                    | 4.36          | [4]       |
| Fe <sub>1.5</sub> -N-GDY         | colorimetric | 100-2000                  | 52.96         | [5]       |
| Fe-Co LDH                        | photothermal | 10-1000                   | 2.56          | This work |

Table S2 Comparison of determination methods for glucose

| Materials                                                | Methods      | Linear rang<br>( $\mu$ M) | LOD( $\mu$ M) | Reference |
|----------------------------------------------------------|--------------|---------------------------|---------------|-----------|
| GelRed/[G <sub>3</sub> T] <sub>5</sub> /Tb <sup>3+</sup> | Fluorescence | 10-100                    | 3.8           | [6]       |

|                                       |                  |          |      |           |
|---------------------------------------|------------------|----------|------|-----------|
| Fe <sub>3</sub> O <sub>4</sub> @MSN   | colorimetric     | 10-500   | 40   | [7]       |
| Bi-BDC-NH <sub>2</sub> @Au            | photothermal     | 10-12000 | 5.7  | [8]       |
| Cu <sub>9</sub> -Zn <sub>1</sub> -MOF | colorimetric     | 10-300   | 7.1  | [9]       |
| CuO/SnS <sub>2</sub>                  | Electrochemistry | 0-20000  | 9.7  | [10]      |
| Fe-Co LDH                             | photothermal     | 10-1000  | 2.51 | This work |

Table S3 Comparison of the peroxidase-like activity and sensing performance of various nanozyme systems for glucose detection

| Nanozyme Type | Nanozyme Composition                | Linear rang (μM) | LOD(μM) | Reference |
|---------------|-------------------------------------|------------------|---------|-----------|
| Fe-Based      | Fe <sub>3</sub> O <sub>4</sub> @MSN | 10-500           | 40      | [7]       |
| Co-Based      | Co-MOF@Hemin                        | 300-3000         | 49      | [11]      |
| Fe-Co-Based   | CuZnFeS                             | 16-60            | 4.1     | [12]      |
| LDH-Based     | carbon fiber @CuAl-LDH              | 5-100            | 3.8     | [13]      |
| LDH-Based     | CuNiAl LDH                          | 10-200           | 2.9     | [14]      |
| Fe-LDH-Based  | NiFe-LDH                            | 50-2000          | 23      | [15]      |
| Co-LDH-Based  | Co-Al ELDH                          | 50-500           | 50      | [16]      |
| Fe-Co LDH     | photothermal                        | 10-1000          | 2.51    | This work |

## References

1. H. Zheng, C. Liu, Y. Zeng, J. Chen, J. Lu, R. Lin, R. Cao, Z. Lin, J. Su, MOF-808: A Metal-Organic Framework with Intrinsic Peroxidase-Like Catalytic Activity at Neutral pH for Colorimetric Biosensing. *Inorg. Chem.* 2018, **57**, 9096–9104.
2. M. Shao, Y. Xu, Q. Shi, Y. Guo, F. Guo, H. Zeng, C. Li, M. Chen. Co<sub>3</sub>O<sub>4</sub> hollow nanoparticles embedded in carbon nanoboxes as peroxidase-like nanozymes for the colorimetric determination of H<sub>2</sub>O<sub>2</sub> and dopamine, *Microchem. J.* 2024, **205**, 111363.
3. F. Xia, Q. Shi, Z. Nan, Facile synthesis of Cu-CuFe<sub>2</sub>O<sub>4</sub> nanozymes for sensitive assay of H<sub>2</sub>O<sub>2</sub> and GSH. *Dalton. T.* 2020, **49**, 12780–12792.
4. W. Lu, S. Chen, H. Zhang, J. Qiu, X. Liu, Fe-N-C single atom nanozymes with dual enzyme-mimicking activities for colorimetric detection of hydrogen peroxide and glutathione. *J. Materiomics*, 2022, **8**, 1251–1259.
5. J. Liu, X. Guo, H. Huang, R. Cui, D. Wang, Y. Chen, Y. Chai, J. Dong, B. Sun, Y. Lian, Y. Enhanced Peroxidase-like Activity of Graphdiyne-Based Nanozymes by Fe and N Codoping for Colorimetric Determination of H<sub>2</sub>O<sub>2</sub> and Ascorbic Acid. *ACS Appl.*

*Nano Mater.* 2023, **6**, 22142–22151.

6. J. Chen, S. Xue, Z. Chen, S. Zhang, G. Shi, M. Zhang, GelRed/[G<sub>3</sub>T]<sub>5</sub>/Tb<sup>3+</sup> hybrid: a novel label-free ratiometric fluorescent probe for H<sub>2</sub>O<sub>2</sub> and oxidase-based visual biosensing, *Biosens. Bioelectron.*, 2017, **100**, 526–532.

7. Y. Wang, B. Zhou, S. Wu, K. Wang, X. He, Colorimetric detection of hydrogen peroxide and glucose using the magnetic mesoporous silica nanoparticles, *Talanta*, 2015, **100**, 712–717.

8. C. Jin, S. Yang, J. Zheng, F. Chai, M. Tian, Paper-based triple-readout nanosensor for point-of-care detection of glucose in urine. *Biosens. Bioelectron.*, 2025, **269**, 116931.

9. T. Chen, Y. Jiang, Y. Wu, M. Lai, X. Huang, Z. Gu, J. Wu, Y. Gan, H. Chen, W. Zhi, P. Sun, F. Cai, T. Li, H. Zhou, J. Zheng, Doughnut-shaped bimetallic Cu–Zn-MOF with peroxidase-like activity for colorimetric detection of glucose and antibacterial applications, *Talanta*, 2024, **279**, 126544.

10. S. Kondee, W. Pon-On, W. Siriwatcharapiboon, A. Tuantranont, C. Wongchoosuk, CuO/SnS<sub>2</sub> Nanoparticles on PEDOT:PSS for Nonenzymatic Electrochemical Glucose Sensors. *ACS Appl. Nano Mater.* 2024, **7**, 6722–6735.

11. W. Qi, Z. Li, X. Wang, H. Wang, X. Li, A Co(II)–organic framework and peroxidase mimetic Hemin@metal–organic framework and its application in the colorimetric analysis of glucose, *Appl. Organomet Chem.* 2023, **37**, e7012.

12. A. Dalui, B. Pradhan, U. Thupakula, A. Khan, G. Kumar, T. Ghosh, B. Satpati, S. Acharya, Insight into the mechanism revealing the peroxidase mimetic catalytic activity of quaternary CuZnFeS nanocrystals: colorimetric biosensing of hydrogen peroxide and glucose, *Nanoscale*, 2015, **7**, 9062–9074.

13. L. Wu, G. Wan, S. Shi, Z. H, X. Xu, Y. Tang, C. Hao, G. Wang, Atomic layer deposition-assisted growth of CuAl LDH on carbon fiber as a peroxidase mimic for colorimetric determination of H<sub>2</sub>O<sub>2</sub> and glucose, *New J. Chem.* 2019, **43**, 5826–5832.

14. L. Wu, X. Zhou, G. Wan, Y. Tang, S. Shi, X. Xu, G. Wang, Novel hierarchical CuNiAl LDH nanotubes with excellent peroxidase-like activity for wide-range detection of glucose, *Dalton Trans.*, 2021, **50**, 95–102.

15. T. Zhan, J. Kang, X. Li, L. Pan, G. Li, W. Hou, NiFe layered double hydroxide nanosheets as an efficiently mimic enzyme for colorimetric determination of glucose and H<sub>2</sub>O<sub>2</sub>, *Sensor Actuat B-Chem*, 2018, **255**, 2635–2642.

16. L. Chen, B. Sun, X. Wang, F. Qiao, S. Ai, 2D ultrathin nanosheets of Co–Al layered double hydroxides prepared in L-asparagine solution: enhanced peroxidase-like activity and colorimetric detection of glucose, *J. Mater. Chem. B*, 2013, **1**, 2268–2274.
